# Supplementary material for: A new Omicron lineage with Spike Y451H mutation that dominated a new COVID-19 wave in Kilifi, Coastal Kenya: March-May 2023
Source: bioRxiv or medRxiv preprint supplement (doi:10.1101/2023.07.03.23292158), 2023-07-03
Supplement: Supplementary file [file media-1.pdf]

## SUPPLEMENTAL TABLE

### **Data Availability**

GISAID Identifier: EPI\_SET\_230627zw

doi: [10.55876/gis8.230627zw](https://doi.org/10.55876/gis8.230627zw)

All genome sequences and associated metadata in this dataset are published in GISAID's EpiCoV database. To view the contributors of each individual sequence with details such as accession number, Virus name, Collection date, Originating Lab and Submitting Lab and the list of Authors, visit [10.55876/gis8.230627zw](https://gisaid.org/230627zw)

### **Data Snapshot**

- EPI\_SET\_230627zw is composed of 101 individual genome sequences.
- The collection dates range from 2023-03-27 to 2023-05-31;
- Data were collected in 1 countries and territories;
- All sequences in this dataset are compared relative to hCoV-19/Wuhan/WIV04/2019 (WIV04), the official reference sequence employed by GISAID (EPI\_ISL\_402124). Learn more at <https://gisaid.org/WIV04>.
